# Supplementary material
Source: MDPI journal article supplement (https://www.mdpi.com/2073-4395/12/8/1829)
Supplement: s1 [file s1]

## Supplementary data

**Table S1.** The LC-MS and NMR information for metabolites PYPA, PYPAC, DPH-Pyr, 4'-OH-Pyr, and 5"-OH-Pyr.

| Compound  | LC-MS                                       | <sup>1</sup> H NMR                                                                                                                                                                                                                                               |
|-----------|---------------------------------------------|------------------------------------------------------------------------------------------------------------------------------------------------------------------------------------------------------------------------------------------------------------------|
| PYP A     | (ES, <i>m/z</i> ): [M+H] <sup>+</sup> = 154 | (300 MHz, Chloroform- <i>d</i> ): δ 1.36 (d, <i>J</i> = 6.5 Hz, 3H), 3.72 – 3.91 (m, 2H), 4.01 – 4.35 (m, 1H), 5.00 – 5.30 (m, 1H), 6.62 – 6.86 (m, 1H), 6.86 – 7.02 (m, 1H), 7.47 – 7.74 (m, 1H), 8.00 – 8.23 (m, 1H)                                           |
| PYP AC    | (ES, <i>m/z</i> ): [M+H] <sup>+</sup> = 168 | (300 MHz, DMSO- <i>d</i> <sub>6</sub> ): δ 1.50 (d, <i>J</i> = 7.0 Hz, 3H), 5.17 (q, <i>J</i> = 7.0 Hz, 1H), 6.68 – 6.91 (m, 1H), 6.91 – 7.12 (m, 1H), 7.53 – 7.88 (m, 1H), 8.00 – 8.24 (m, 1H), 12.71 (s, 1H)                                                   |
| DPH-Pyr   | (ES, <i>m/z</i> ): [M+H] <sup>+</sup> = 246 | (400 MHz, Chloroform- <i>d</i> ): δ 1.45 (d, <i>J</i> = 6.4 Hz, 3H), 3.92 – 4.04 (m, 1H), 4.07 – 4.16 (m, 1H), 5.16 – 5.66 (m, 1H), 6.62 – 6.86 (m, 5H), 6.80 – 7.01 (m, 1H), 7.47 – 7.65 (m, 1H), 8.06 – 8.36 (m, 1H)                                           |
| 4'-OH-Pyr | (ES, <i>m/z</i> ): [M+H] <sup>+</sup> = 338 | (400 MHz, Chloroform- <i>d</i> ): δ 1.50 (d, <i>J</i> = 6.4 Hz, 3H), 4.08 (dd, <i>J</i> = 9.9, 4.7 Hz, 1H), 4.18 (dd, <i>J</i> = 9.9, 5.4 Hz, 1H), 5.46 – 5.75 (m, 1H), 5.87 (s, 1H), 6.72 – 7.00 (m, 10H), 7.54 – 7.64 (m, 1H), 8.11 – 8.27 (m, 1H)             |
| 5"-OH-Pyr | (ES, <i>m/z</i> ): [M+H] <sup>+</sup> = 338 | (400 MHz, Chloroform- <i>d</i> ): δ 1.45 (d, <i>J</i> = 6.3 Hz, 3H), 4.01 – 4.09 (m, 1H), 4.11 – 4.19 (m, 1H), 5.35 – 5.46 (m, 1H), 6.63 – 6.71 (m, 1H), 6.86 – 7.00 (m, 6H), 7.00 – 7.09 (m, 1H), 7.14 – 7.22 (m, 1H), 7.24 – 7.34 (m, 2H), 7.72 – 7.79 (m, 1H) |

**Table S2.** Residue dissipation of pyriproxyfen and its metabolites on fresh tea leaves.

| Time (d)             | Pyriproxyfen            |             | PYPA        | PYPAC       | DPH-Pyr     | 5"-OH-Pyr   | 4'-OH-Pyr   |
|----------------------|-------------------------|-------------|-------------|-------------|-------------|-------------|-------------|
|                      | Residues                | Dissipation | Residues    | Residues    | Residues    | Residues    | Residues    |
|                      | (mg/kg)                 | rate (%)    | (mg/kg)     | (mg/kg)     | (mg/kg)     | (mg/kg)     | (mg/kg)     |
| 0 (2 h)              | 14.552±0.904            | 32.6        | 0.007±0.001 | 0.002±0.000 | 0.003±0.001 | 0.041±0.003 | 0.073±0.005 |
| 1                    | 9.807±0.292             | 63.2        | 0.020±0.002 | 0.005±0.000 | 0.008±0.001 | 0.091±0.011 | 0.295±0.033 |
| 2                    | 5.359±0.171             | 70.6        | 0.032±0.002 | 0.010±0.001 | 0.020±0.001 | 0.073±0.002 | 0.384±0.007 |
| 3                    | 4.280±0.203             | 86.7        | 0.054±0.003 | 0.013±0.001 | 0.035±0.003 | 0.070±0.003 | 0.508±0.059 |
| 5                    | 1.939±0.146             | 92.7        | 0.039±0.003 | 0.019±0.003 | 0.035±0.003 | 0.052±0.002 | 0.299±0.013 |
| 7                    | 1.055±0.088             | 98.2        | 0.048±0.002 | 0.021±0.003 | 0.033±0.002 | 0.031±0.002 | 0.187±0.008 |
| 10                   | 0.265±0.029             | 99.1        | 0.025±0.001 | 0.023±0.003 | 0.015±0.001 | 0.017±0.001 | 0.039±0.003 |
| 14                   | 0.126±0.006             | 99.9        | 0.016±0.001 | 0.018±0.002 | 0.008±0.001 | 0.008±0.000 | 0.023±0.001 |
| 21                   | 0.010±0.002             | 100.0       | /           | 0.014±0.002 | 0.003±0.002 | 0.003±0.003 | 0.005±0.003 |
| Dissipation equation | $C = 8.7121e^{-0.280t}$ |             |             |             |             |             |             |
| $R^2$                | 0.9587                  |             |             |             |             |             |             |
| $t_{1/2}$ (d)        | 2.48                    |             |             |             |             |             |             |

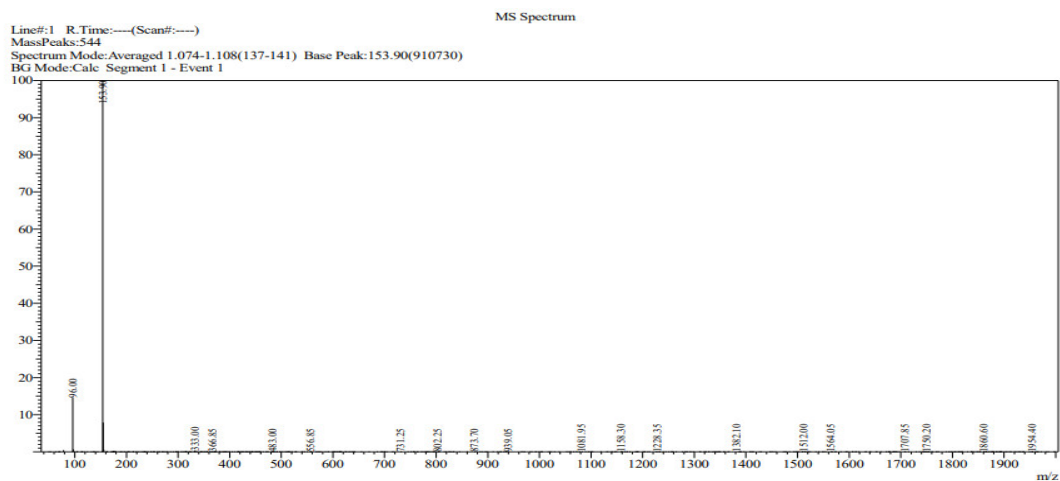

H-NMR-compound-7  
CDCL<sub>3</sub>

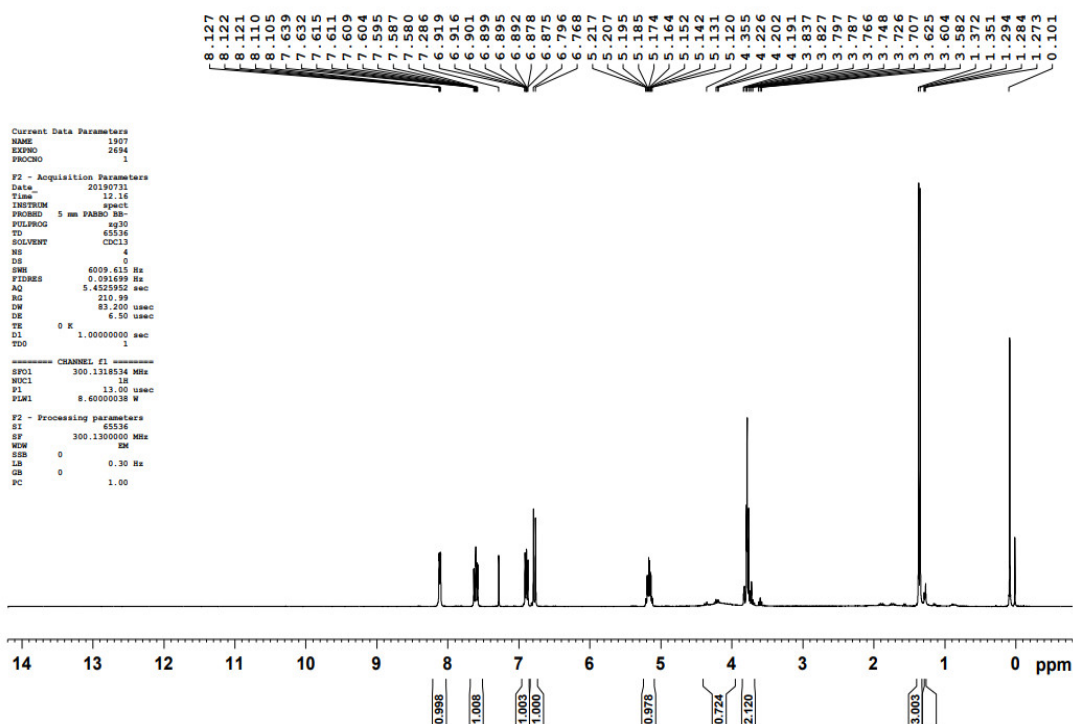

a. The LC-MS mass spectrum and <sup>1</sup>H NMR spectrum of PYPA

Line#:1 R.Time:----(Scan#:----)

# Mass Spectrum

MassPeaks:465

Spectrum Mode:Averaged 0.793-0.826(109-113) BasePeak:168.20(1327634)

BG Mode:Calc Segment 1 - Event 1

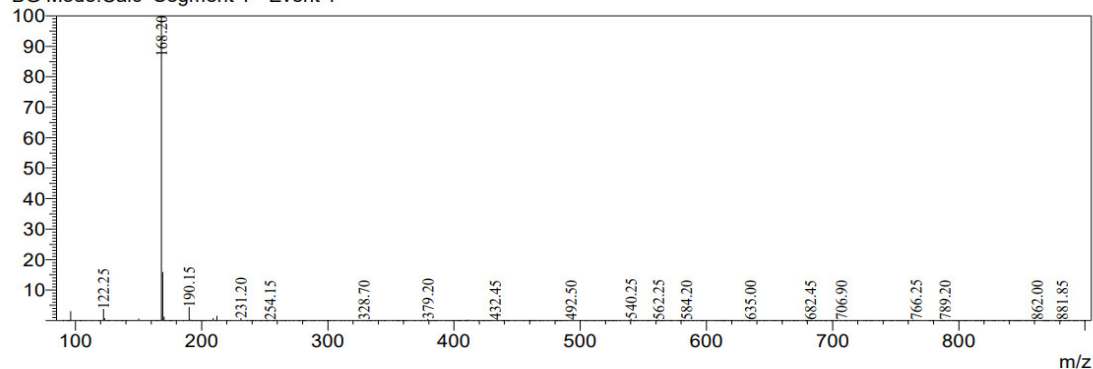

H-NMR-compound-8  
DMSO

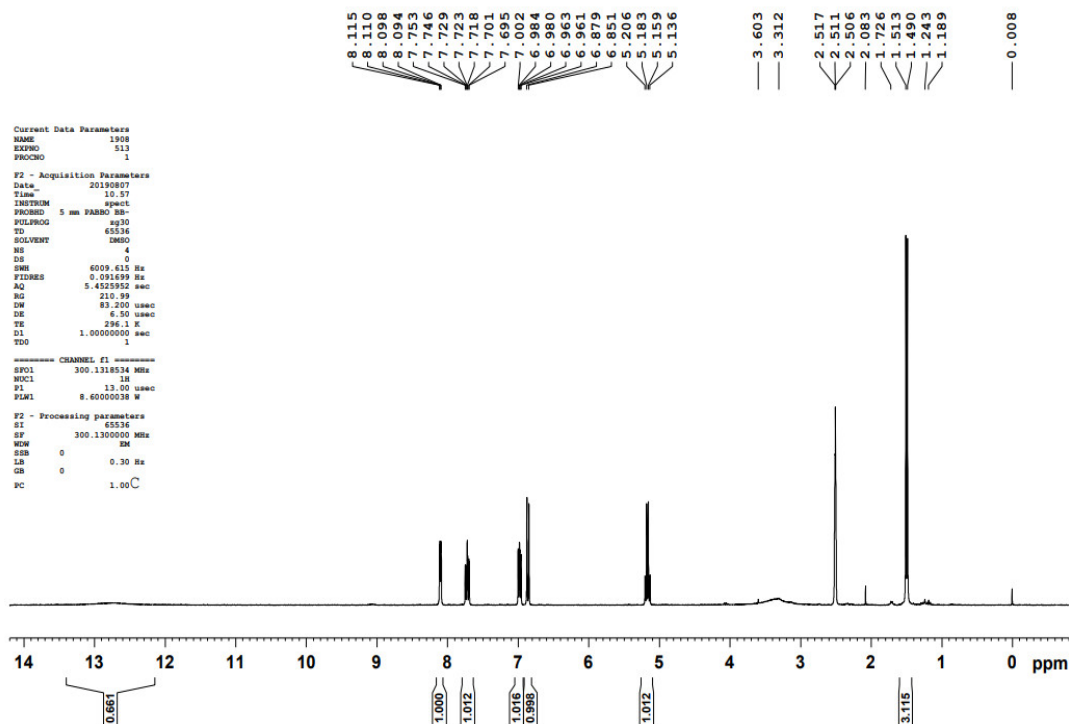

b. The LC-MS mass spectrum and <sup>1</sup>H NMR spectrum of PYPAC

Line#1 R.Time:---(Scan#:---)  
 MassPeaks:434  
 Spectrum Mode:Averaged 0.843-0.876(115-119) BasePeak:246.20(2356355)  
 BG Mode:Calc Segment 1 - Event 1

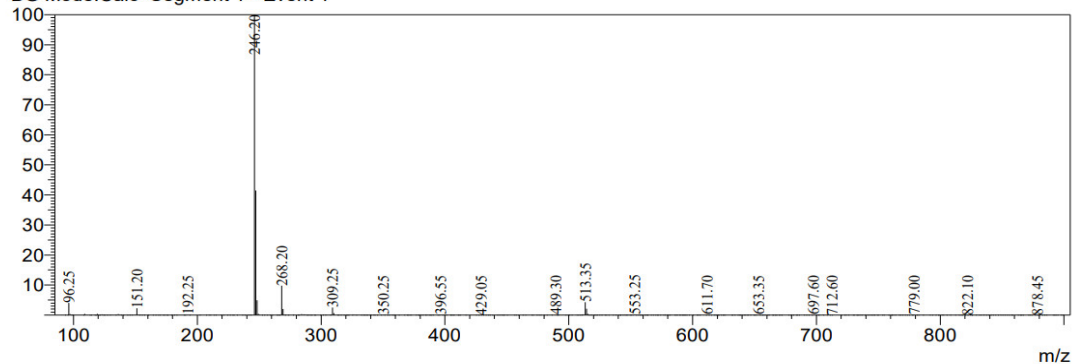

H-NMR-compound-2  
 CDCL3

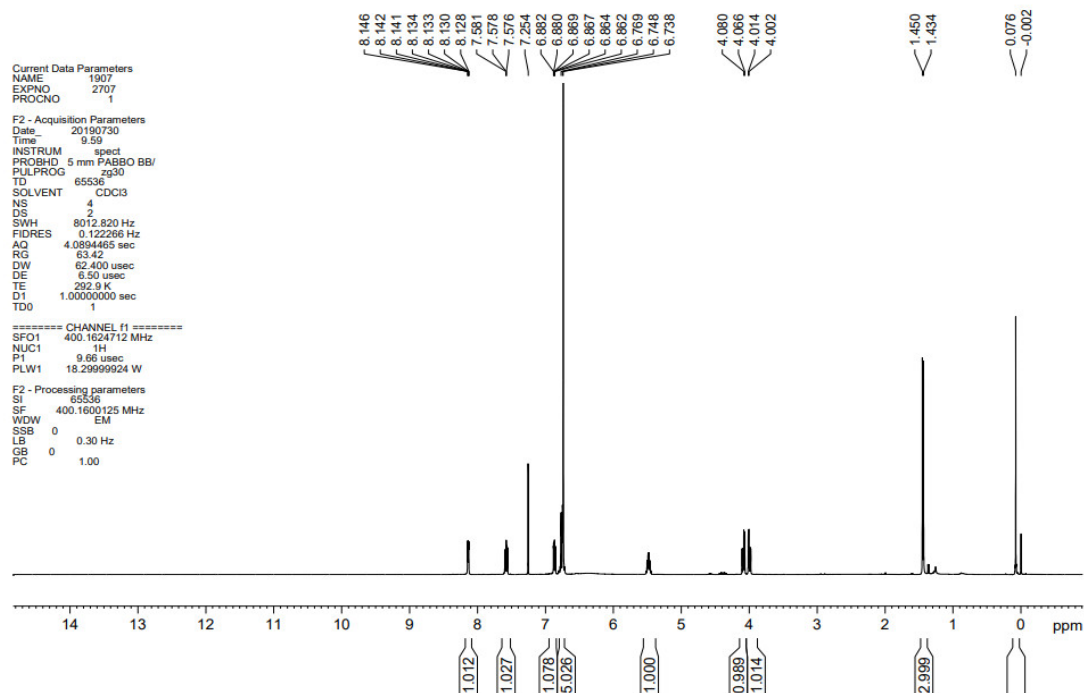

c. The LC-MS mass spectrum and <sup>1</sup>H NMR spectrum of DPH-Pyr

Line#:1 R.Time:---(Scan#:---)

Spectrum Mode: Averaged 2.156-2.190(269-273) Base Peak: 338.10(311632)

BG Mode:Calc Segment 1 - Event 1

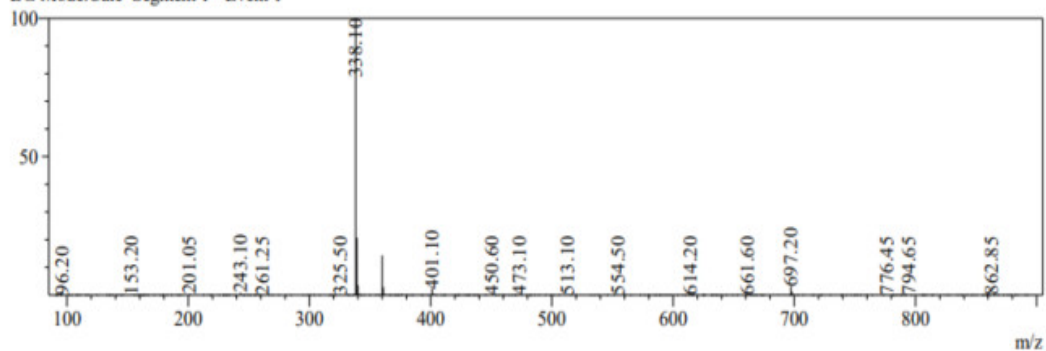

H-NMR-compound-1  
CDCL3

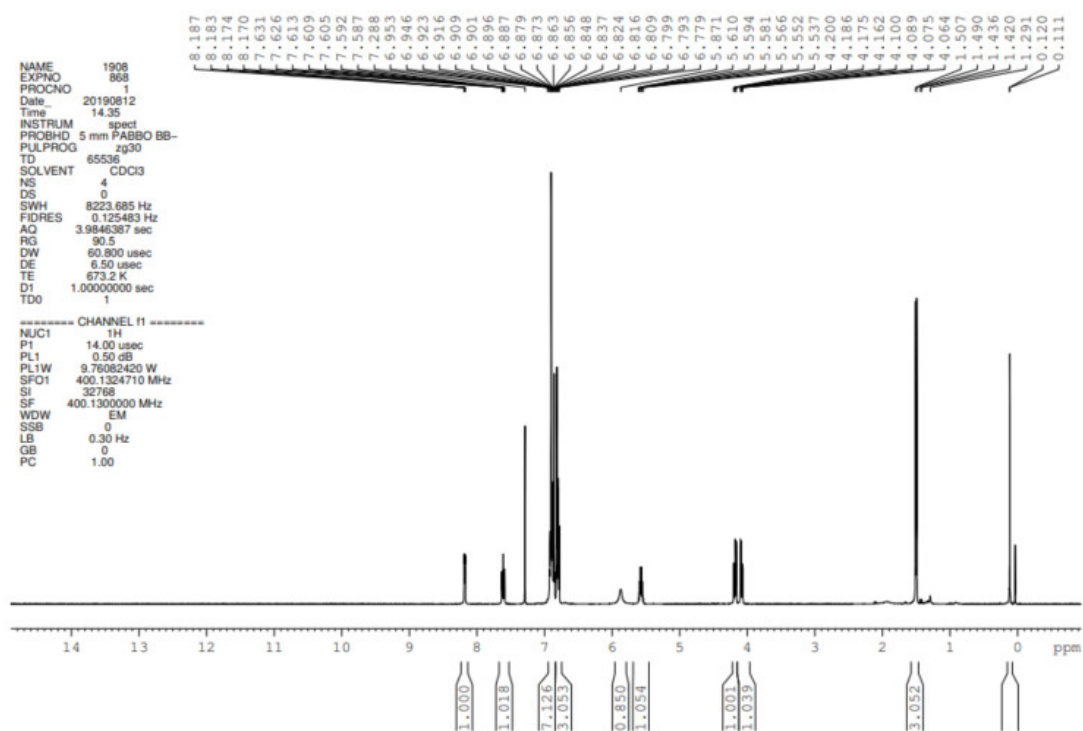

d. The LC-MS mass spectrum and <sup>1</sup>H NMR spectrum of 4'-OH-Pyr

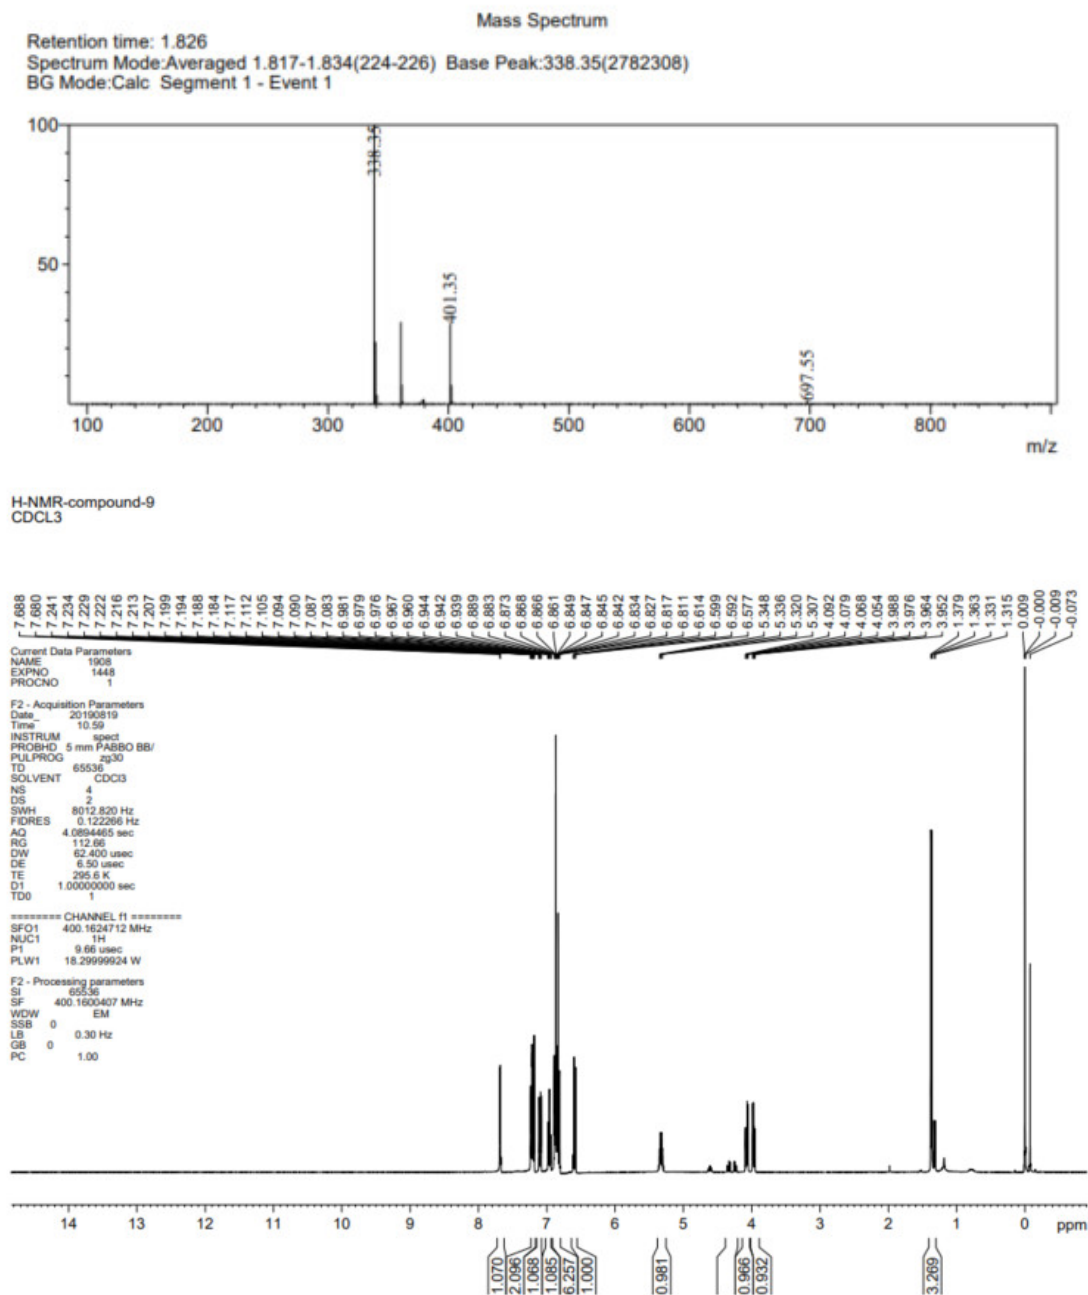

e. The LC-MS mass spectrum and <sup>1</sup>H NMR spectrum of 5''-OH-Pyr

**Figure S1.** The LC-MS and NMR spectra of metabolites PYPA (a), PYPAC (b), DPH-Pyr (c), 4'-OH-Pyr (d), and 5''-OH-Pyr (e).

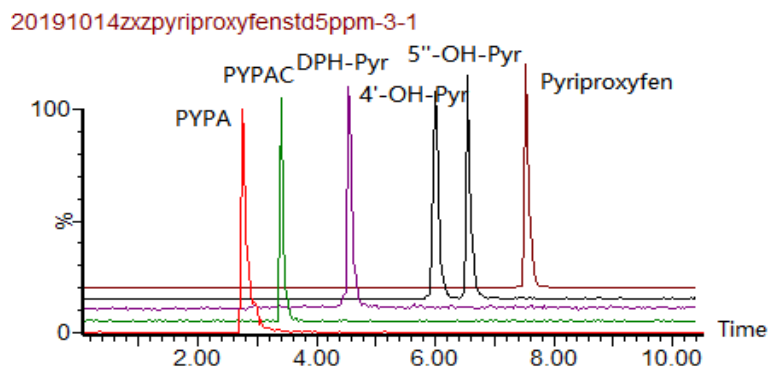

**Figure S2.** The chromatogram of pyriproxyfen and its metabolites under the optimized chromatographic conditions.

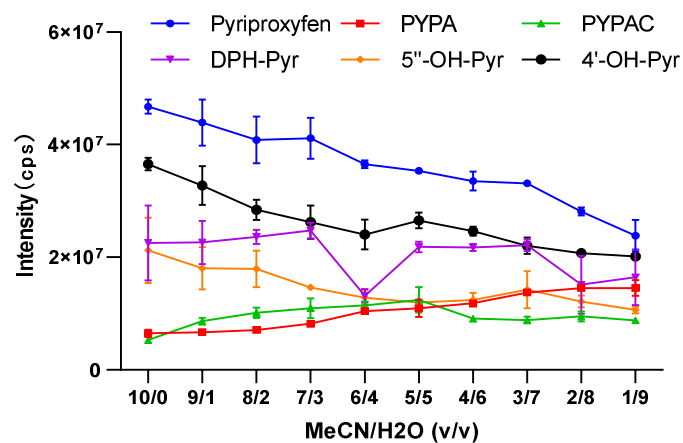

**Figure S3.** The responses of pyriproxyfen and its metabolites at different volume proportions of MeCN/H<sub>2</sub>O as the injection solvents.

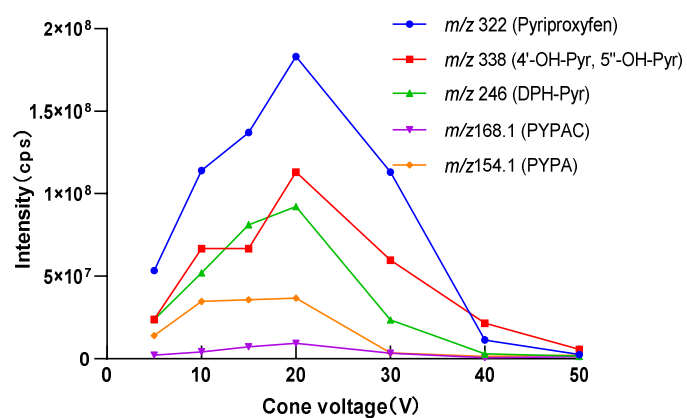

**Figure S4.** The responses of pyriproxyfen and its metabolites under different cone voltages.

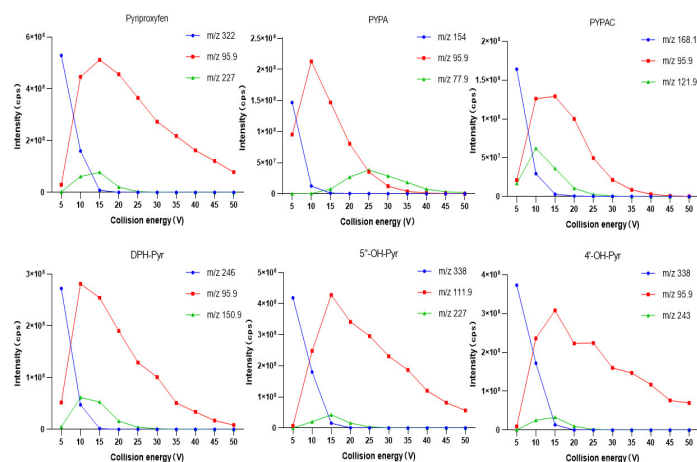

**Figure S5.** The responses of parent and daughter ions of pyriproxyfen and its metabolites under different collision energies.

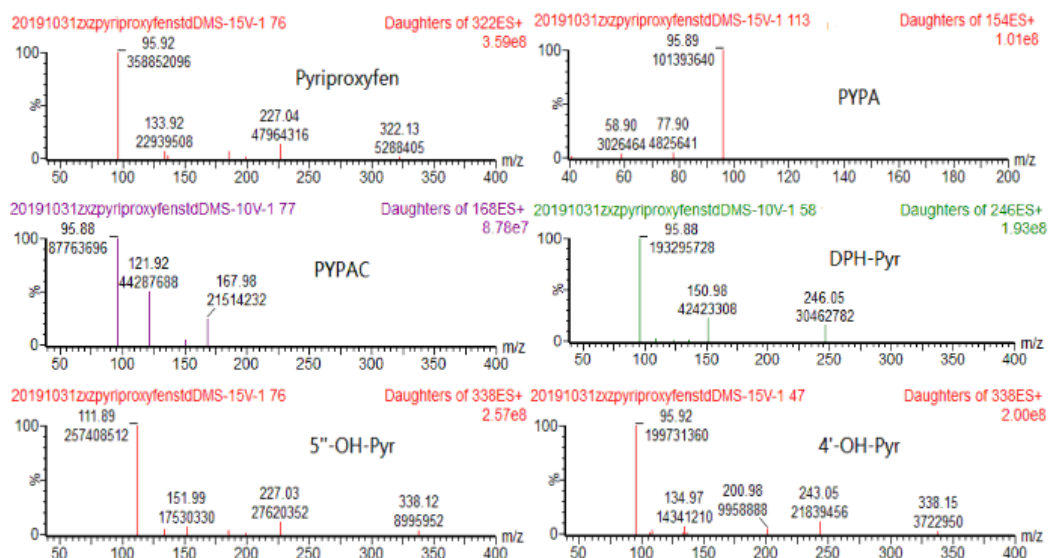

**Figure S6.** The fragmentation mass spectrometry of pyriproxyfen and its metabolites.

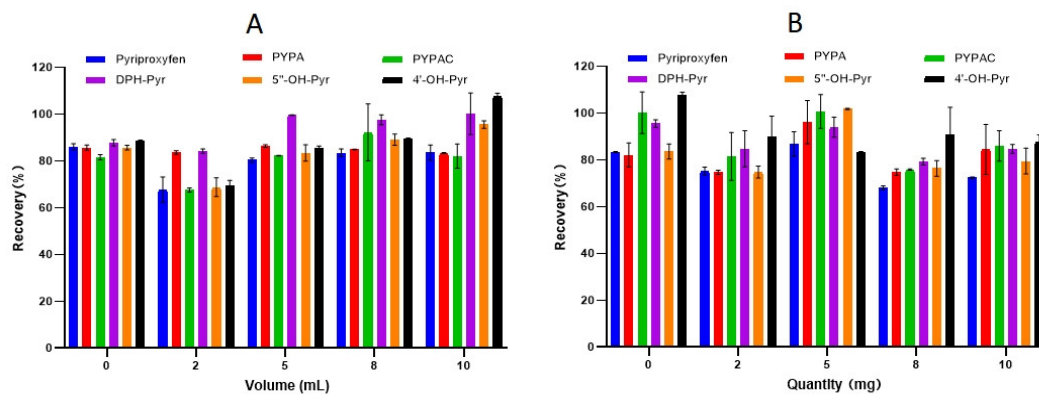

**Figure S7.** The recoveries of pyriproxyfen and its metabolites in different volumes of H<sub>2</sub>O with 5% FA (A) and different quantities of MgSO<sub>4</sub> (B).



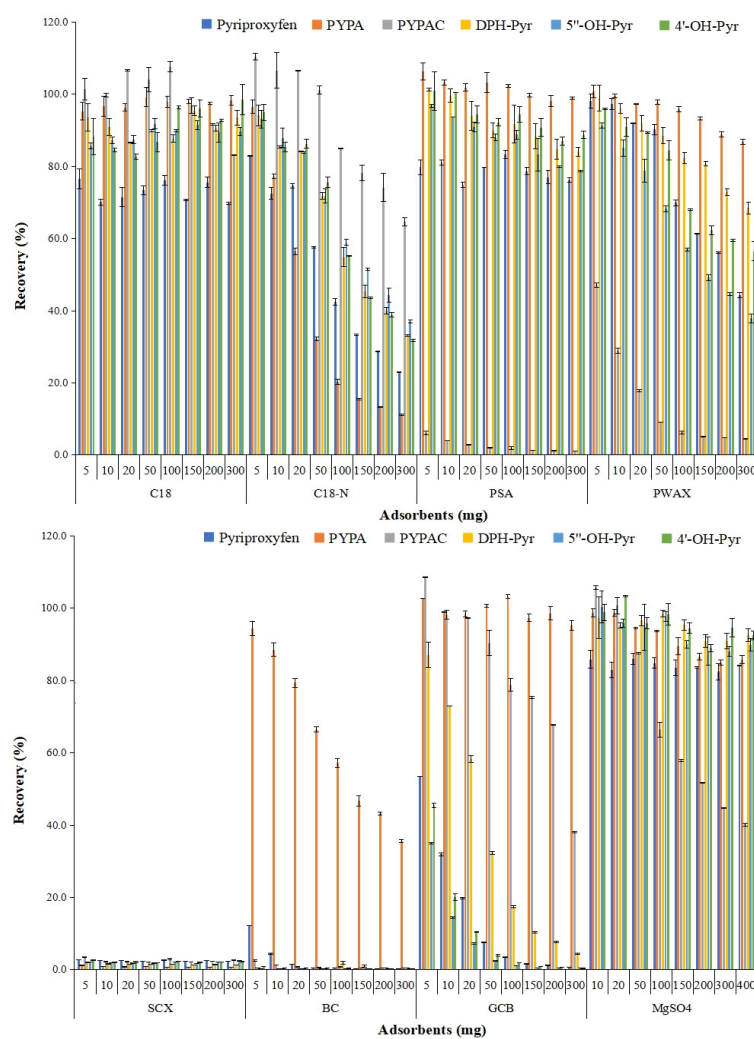

**Figure S8.** The recoveries of pyriproxyfen and its five metabolites under different types and different usages of purification adsorbents.
